# Supplementary material for: Snails as Temporal Biomonitors of the Occurrence and Distribution of Pesticides in an Apple Orchard
Source: MDPI journal article supplement (doi:10.3390/atmos13081185), 2022-07-27
Supplement: s1 [file s1]

# Snails as Temporal Biomonitors of the Occurrence and Distribution of Pesticides in an Apple Orchard

Josephine Al-Alam <sup>1</sup>, Maurice Millet <sup>2</sup>, Dani Khoury <sup>2</sup>, Anaïs Rodrigues <sup>2</sup>, Moustapha Harb <sup>1</sup>, Elias Akoury <sup>3</sup>, Sima Tokajian <sup>3</sup> and Mahmoud Wazne <sup>1,\*</sup>

<sup>1</sup> Civil Engineering Department, Lebanese American University, 309 Bassil Building, Byblos, Lebanon; josephine.elalam@lau.edu.lb (J.A.-A.); moustapha.harb@lau.edu.lb (M.H.)

<sup>2</sup> Institute of Chemistry and Processes for Energy, Environment and Health ICPEES, UMR 7515 Group of Physical Chemistry of the Atmosphere, University of Strasbourg, 67087 Strasbourg, France; mmillet@unistra.fr (M.M.); dani.khoury@etu.unistra.fr (D.K.); anaisrodrigues@unistra.fr (A.R.)

<sup>3</sup> Department of Natural Sciences, Lebanese American University, Chouran, Beirut 1102-2801, Lebanon; elias.akoury@lau.edu.lb (E.A.); stokajian@lau.edu.lb (S.T.)

\* Correspondence: mahmoud.wazne@lau.edu.lb; Tel.: +961-9547254 (ext. 2518)

## Section S1. List of assessed pesticides

**List of non-volatile pesticides:** pymetrozine, carbendazim, chloridazon, acetamiprid, nicosulfuron, thiacloprid, chlortoluron, carbetamide, terbutryn, spinosad A, isoproturon, diuron, metalaxyl-M, spinosad D, dimethenamid-p, penconazole, isoxadifen, tebuconazole, diflubenzuron, epoxiconazole, prothioconazole, propiconazole, chlorfenvinphos, triflusulfuron methyl, pendimethalin, cyazofamid, pyraclostrobine, diflufenican, flufenoxuron, and lufenuron.

**List of semi-volatile pesticides:** clofentezine, dichlobenil, etridiazole, diphenylamine, trifluralin, chlorpropham, tebutam, clomazone, propyzamide, lindane, pyrimethanil, dimethenamid-P, dimethachlor, acetochlor, alachlor, fenpropidin, carbaryl, ethofumesate, malathion, fenpropimorph, metolachlor-S, chlorpyrifos, flurochloridone, cyprodinil, pendimethalin, tolyfluanid, metazachlor, penconazole, procymidone, captan, folpet, oxadiazon, buprofezine, kresoxim-methyl, bupirimate, flusilazole, myclobutanil, aclonifen, trifloxystrobin, bromoxynil octanoate, propiconazole, quinoxifen, lenacile, diclofop-methyl, chloridazon, diflufenicanil, fluazinam, tebuconazole, bifenthrin, dimoxystrobin, epoxiconazole, fenoxycarb, isoxaflutole, tebufenpyrad, bifenox, lambda cyhalothrin, fenarimol, pyraclostrobin, prochloraz, cypermethrin, boscalid, indoxacarb, difenoconazole, deltamethrin, azoxystrobin, dimethomorph, spiromamine, and metamitron.

**Table S1.** Method validation parameters.

| Compounds      | Regression line equation | Regression coefficient | Limit of detection (ng/g) | Limit of quantification (ng/g) | Repeatability (intra-day RSD%) | Reproducibility (Inter-day RSD %) | Recovery (%) |
|----------------|--------------------------|------------------------|---------------------------|--------------------------------|--------------------------------|-----------------------------------|--------------|
| pymetrozine    | $Y = 0.0008 * X$         | 0.995                  | 2.63                      | 8.8                            | 4.59                           | 8.74                              | 67.80        |
| carbendazim    | $Y = 0.0040 * X$         | 0.996                  | 1.13                      | 3.78                           | 4.22                           | 5.19                              | 72.09        |
| chloridazon    | $Y = 0.0021 * X$         | 0.997                  | 1.01                      | 3.39                           | 0.55                           | 4.15                              | 85.53        |
| acetamiprid    | $Y = 0.0011 * X$         | 0.998                  | 5.13                      | 17.1                           | 0.93                           | 5.73                              | 74.73        |
| thiacloprid    | $Y = 0.010 * X$          | 0.995                  | 1.96                      | 6.53                           | 1.45                           | 4.83                              | 79.26        |
| nicosulfuron   | $Y = 0.0009 * X$         | 0.997                  | 5.22                      | 17.41                          | Nd                             | Nd                                | Nd           |
| foramsulfuron  | $Y = 0.0014 * X$         | 0.998                  | 2.71                      | 9.03                           | 4.06                           | 4.42                              | 97.40        |
| chlortoluron   | $Y = 0.010 * X$          | 0.998                  | 1.98                      | 6.61                           | 1.81                           | 5.58                              | 74.03        |
| carbetamide    | $Y = 0.0073 * X$         | 0.997                  | 2.56                      | 8.58                           | 3.21                           | 5.46                              | 67.37        |
| terbutryn      | $Y = 0.0242 * X$         | 0.993                  | 1.99                      | 6.64                           | 0.10                           | 3.96                              | 84.03        |
| spinosad A     | $Y = 0.0294 * X$         | 0.996                  | 4.19                      | 14                             | 0.48                           | 5.81                              | 72.43        |
| isoproturon    | $Y = 0.0244 * X$         | 0.998                  | 1.19                      | 3.95                           | 0.09                           | 5.90                              | 79.04        |
| diuron         | $Y = 0.0050 * X$         | 0.999                  | 0.52                      | 1.73                           | 1.43                           | 4.79                              | 77.79        |
| metalaxyl-M    | $Y = 0.0043 * X$         | 0.996                  | 4.42                      | 14.7                           | 1.93                           | 6.34                              | 69.12        |
| DPMU           | $Y = 0.0060 * X$         | 0.997                  | 1.73                      | 5.77                           | Nd                             | Nd                                | Nd           |
| spinosad D     | $Y = 0.0067 * X$         | 0.996                  | 0.16                      | 0.55                           | 0.61                           | 4.97                              | 82.21        |
| dimethenamid-P | $Y = 0.1194 * X$         | 0.997                  | 0.46                      | 1.55                           | 1.01                           | 4.38                              | 92.87        |
| penconazole    | $Y = 0.0145 * X$         | 0.998                  | 1.42                      | 4.73                           | 1.84                           | 6.85                              | 97.68        |
| isoxadifen     | $Y = 0.0076 * X$         | 0.998                  | 1.76                      | 5.85                           | 1.60                           | 4.93                              | 77.05        |
| tebuconazole   | $Y = 0.0188 * X$         | 0.994                  | 0.94                      | 3.13                           | 0.49                           | 5.71                              | 92.61        |
| epoxiconazole  | $Y = 0.0715 * X$         | 0.998                  | 1.06                      | 3.53                           | 0.06                           | 6.74                              | 87.00        |

|                |                                          |       |       |       |      |       |        |
|----------------|------------------------------------------|-------|-------|-------|------|-------|--------|
| propiconazole  | $Y = 0.0302 * X$                         | 0.997 | 3.73  | 12.43 | 1.33 | 5.60  | 94.10  |
| clofenvinphos  | $Y = 0.0045 * X$                         | 0.998 | 3.32  | 11.08 | 2.50 | 6.27  | 73.50  |
| triflu-Methyl  | $Y = 0.0185 * X$                         | 0.999 | 1.51  | 5.04  | 0.13 | 4.87  | 101.65 |
| pendimethalin  | $Y = 0.0160 * X$                         | 0.998 | 1.68  | 5.6   | 0.79 | 5.25  | 95.63  |
| cyazofamid     | $Y = 8.8e-005 * X$                       | 0.995 | 2.48  | 8.26  | 0.75 | 7.81  | 98.25  |
| pyraclostrobin | $Y = 0.0154 * X$                         | 0.992 | 0.79  | 2.63  | 0.00 | 5.77  | 77.28  |
| diflufenican   | $Y = 0.0465 * X$                         | 0.997 | 1.03  | 3.44  | 0.83 | 6.03  | 98.50  |
| flufenoxuron   | $Y = 0.0087 * X$                         | 0.995 | 1.11  | 3.71  | 2.60 | 5.72  | 95.49  |
| lufenuron      | $Y = 0.0007 * X$                         | 0.997 | 5.87  | 19.57 | 0.63 | 6.87  | 97.53  |
| clofentezine   | $Y = 0.030 * X - 1.82e-006 * X^2$        | 0.994 | 3.75  | 12.5  | 4.51 | 12.31 | 91.47  |
| dichlobenil    | $Y = 0.080 * X + 4.68e-005 * X^2$        | 0.996 | 0.27  | 0.89  | 3.35 | 9.88  | 86.52  |
| etridiazole    | $Y = 0.076 * X + 3.66e-006 * X^2$        | 0.998 | 5.64  | 18.8  | 7.61 | 9.86  | 79.62  |
| diphenylamine  | $Y = 0.321 * X + 0.0001 * X^2$           | 0.998 | 2.31  | 7.69  | 7.59 | 10.03 | 80.58  |
| trifluralin    | $Y = 0.008 * X + 2.74e-005 * X^2$        | 0.999 | 0.83  | 2.78  | 1.13 | 11.91 | 76.93  |
| chlorpropham   | $Y = 0.056 * X + 1.18e-005 * X^2$        | 0.998 | 5.12  | 17.07 | 9.48 | 8.90  | 78.74  |
| tebutam        | $Y = 0.0817 * X - 4.09e-006 * X^2$       | 0.996 | 5.27  | 17.57 | 2.31 | 10.51 | 82.07  |
| clomazone      | $Y = 0.008 * X + 5.21e-006 * X^2$        | 0.993 | 5     | 16.7  | 6.48 | 7.74  | 81.77  |
| Propyzamide    | $Y = 0.076 * X + 7.17e-005 * X^2$        | 0.996 | 7.33  | 24.43 | 1.85 | 8.18  | 77.86  |
| lindane        | $Y = 0.03 + 0.0032 * X$                  | 0.996 | 0.65  | 2.17  | 7.39 | 9.73  | 81.82  |
| pyrimethanil   | $Y = 0.085 * X + 7.43e-005 * X^2$        | 0.997 | 2.5   | 8.33  | 2.79 | 8.05  | 84.72  |
| dimethenamid-P | $Y = 0.0007 * X + 1.17e-007 * X^2$       | 0.996 | 10.53 | 35.11 | 1.14 | 10.12 | 79.30  |
| dimethachlor   | $Y = 0.0039 * X + 9.18e-006 * X^2$       | 0.999 | 4.17  | 13.89 | 5.91 | 10.61 | 81.94  |
| acetochlor     | $Y = 0.010 * X + 3.00e-005 * X^2$        | 0.996 | 13.53 | 45.11 | 5.94 | 10.49 | 78.61  |
| alachlor       | $Y = 0.0009 * X + 1.39e-006 * X^2$       | 0.991 | 5     | 16.7  | 1.79 | 11.94 | 86.35  |
| fenpropidin    | $Y = 0.0019 * X + 3.27e-006 * X^2$       | 0.992 | 20    | 66.67 | 8.24 | 10.79 | 77.83  |
| carbaryl       | $Y = 0.28 + 0.0049 * X - 2.7e-007 * X^2$ | 0.991 | 5.63  | 18.8  | 4.32 | 11.20 | 82.26  |
| ethofumesate   | $Y = 0.13 + 0.001 * X + 2.25e-006 * X^2$ | 0.997 | 9.38  | 31.3  | 0.26 | 12.29 | 82.12  |
| malathion      | $Y = 0.002 * X - 6.17e-008 * X^2$        | 0.996 | 9.46  | 31.5  | 3.32 | 9.71  | 89.06  |

|                      |                                               |       |       |       |       |       |       |
|----------------------|-----------------------------------------------|-------|-------|-------|-------|-------|-------|
| fenpropimorph        | $Y = 0.002 \cdot X + 3.78e-007 \cdot X^2$     | 0.996 | 7.5   | 25    | 7.29  | 8.01  | 80.89 |
| metolachlor-S        | $Y = 0.053 \cdot X + 2.27e-005 \cdot X^2$     | 0.991 | 6.43  | 21.43 | 2.93  | 12.26 | 84.94 |
| chlorpyrifos         | $Y = 0.003 \cdot X + 7.64e-008 \cdot X^2$     | 0.999 | 4.09  | 13.6  | 6.22  | 9.87  | 89.60 |
| flurochloridone      | $Y = 0.022 \cdot X - 4.32e-006 \cdot X^2$     | 0.993 | 12.27 | 40.9  | 6.80  | 9.23  | 82.26 |
| cyprodinil           | $Y = 0.0212 \cdot X + 1.13e-005 \cdot X^2$    | 0.994 | 5     | 16.7  | 1.13  | 11.41 | 84.00 |
| pendimethalin        | $Y = 0.0012 \cdot X + 3.38e-006 \cdot X^2$    | 0.996 | 7.06  | 23.53 | 1.90  | 9.55  | 85.31 |
| tolyfluanid          | $Y = 0.0003 \cdot X + 2.76e-007 \cdot X^2$    | 0.995 | 5     | 16.7  | 2.79  | 11.62 | 84.14 |
| metazachlor          | $Y = 0.0028 \cdot X - 3.23e-007 \cdot X^2$    | 0.997 | 19.3  | 64.8  | 8.91  | 11.36 | 85.04 |
| penconazole          | $Y = 0.048 \cdot X + 4.63e-005 \cdot X^2$     | 0.972 | 0.22  | 0.72  | 4.73  | 8.11  | 84.94 |
| procymidone          | $Y = 0.0011 \cdot X + 1.80e-007 \cdot X^2$    | 0.997 | 18.6  | 62.1  | 4.16  | 10.80 | 90.77 |
| captan               | $Y = 0.0049 \cdot X - 3.35e-007 \cdot X^2$    | 0.998 | 13.91 | 46.38 | 3.74  | 8.68  | 92.04 |
| folpet               | $Y = 4.76e-005 \cdot X + 2.89e-008 \cdot X^2$ | 0.981 | 11.7  | 38.9  | 6.12  | 9.27  | 80.27 |
| oxadiazon            | $Y = 0.0018 \cdot X - 3.6e-007 \cdot X^2$     | 0.991 | 5     | 16.7  | 6.83  | 10.34 | 84.74 |
| buprofezin           | $Y = 0.002 \cdot X + 1.39e-005 \cdot X^2$     | 0.994 | 7.5   | 25    | 3.92  | 12.58 | 76.55 |
| kresoxim-methyl      | $Y = 0.0001 \cdot X - 1.41e-008 \cdot X^2$    | 0.998 | 11.25 | 37.5  | 7.94  | 9.49  | 80.23 |
| bupirimate           | $Y = 0.099 + 0.005 \cdot X$                   | 0.996 | 11.63 | 38.75 | 8.14  | 11.33 | 82.64 |
| flusilazole          | $Y = 0.014 \cdot X - 8.51e-007 \cdot X^2$     | 0.991 | 2.47  | 8.22  | 12.17 | 10.20 | 76.45 |
| myclobutanil         | $Y = 0.0027 \cdot X + 3.41e-006 \cdot X^2$    | 0.998 | 11.78 | 39.29 | 3.15  | 10.56 | 89.47 |
| aclonifen            | $Y = 1.53 + 0.023 \cdot X$                    | 0.961 | 9.43  | 31.43 | 3.73  | 10.08 | 71.03 |
| trifloxystrobin      | $Y = 0.016 \cdot X + 3.34e-005 \cdot X^2$     | 0.991 | 9.5   | 31.7  | 6.24  | 11.41 | 84.21 |
| bromoxynil octanoate | $Y = 0.007 \cdot X + 2.3e-006 \cdot X^2$      | 0.997 | 13.93 | 46.43 | Nd    | Nd    | Nd    |
| propiconazole        | $Y = 0.008 \cdot X + 2.7e-005 \cdot X^2$      | 0.995 | 1.82  | 6.06  | 3.21  | 11.85 | 79.90 |
| quinoxifen           | $Y = 0.017 \cdot X + 1.52e-005 \cdot X^2$     | 0.991 | 0.44  | 1.47  | 5.91  | 7.66  | 89.66 |
| lenacil              | $Y = 0.0016 \cdot X + 5.41e-007 \cdot X^2$    | 0.998 | 14.4  | 48.1  | 5.64  | 9.31  | 74.17 |

|                    |                                 |       |       |       |       |       |       |
|--------------------|---------------------------------|-------|-------|-------|-------|-------|-------|
| diclophop-methyl   | $Y = 0.068X + 6.27e-005X^2$     | 0.988 | 1.22  | 4.07  | 3.17  | 11.35 | 84.52 |
| chloridazon        | $Y = 0.0001X + 2.49e-007X^2$    | 0.997 | 5     | 16.7  | 0.05  | 11.48 | 81.32 |
| diflufenicanil     | $Y = 0.062X + 0.0003X^2$        | 0.98  | 0.88  | 2.94  | 8.27  | 11.91 | 72.19 |
| fluazinam          | $Y = 9.20e-005X + 1.84e-007X^2$ | 0.995 | 12    | 40    | 2.44  | 9.88  | 79.21 |
| tebuconazole       | $Y = 0.013 + 0.0004X$           | 0.998 | 13.12 | 43.75 | 7.51  | 11.46 | 82.67 |
| bifenthrin         | $Y = 0.127X + 0.0001X^2$        | 0.988 | 9.95  | 33.2  | 4.63  | 8.83  | 79.23 |
| dimoxystrobin      | $Y = 0.150X + 4.36e-005X^2$     | 0.997 | 1.86  | 6.19  | 3.95  | 9.72  | 92.64 |
| epoxiconazole      | $Y = 0.0027X + 2.14e-007X^2$    | 0.99  | 10.73 | 35.77 | 5.86  | 9.91  | 90.87 |
| fenoxycarb         | $Y = 0.0003X + 6.07e-008X^2$    | 0.991 | 6     | 20    | 4.53  | 12.62 | 90.46 |
| isoxaflutole       | $Y = 0.0002X + 9.52e-008X^2$    | 0.993 | 5     | 16.7  | 2.57  | 8.01  | 91.42 |
| tebufenpyrad       | $Y = 0.0013X - 2.02e-007X^2$    | 0.999 | 0.61  | 2.04  | 1.44  | 11.57 | 82.15 |
| bifenox            | $Y = 0.0005X + 1.5e-006X^2$     | 0.999 | 12.39 | 41.3  | 9.56  | 8.84  | 75.20 |
| lambda cyhalothrin | $Y = 0.0013X + 1.06e-005X^2$    | 0.989 | 8.18  | 27.3  | 2.91  | 10.65 | 92.19 |
| fenarimol          | $Y = 0.152 + 0.001X$            | 0.998 | 8.33  | 27.77 | 14.71 | 8.49  | 70.45 |
| pyraclostrobin     | $Y = 0.359 + 0.010X$            | 0.996 | 9.16  | 30.55 | 6.58  | 11.07 | 81.05 |
| prochloraz         | $Y = 0.0023X + 2.43e-006X^2$    | 0.997 | 14.4  | 48    | 6.63  | 9.65  | 79.56 |
| cypermethrin       | $Y = 0.185 + 0.005X$            | 0.997 | 12    | 40    | 6.62  | 7.44  | 79.83 |
| boscalid           | $Y = 0.006X + 1.18e-005X^2$     | 0.998 | 2.34  | 7.81  | 6.74  | 10.12 | 81.90 |
| indoxacarb         | $Y = 0.0009X + 3.29e-006X^2$    | 0.998 | 8.72  | 29.61 | Nd    | Nd    | Nd    |
| difenoconazole     | $Y = 0.0053X + 7.872e-006X^2$   | 0.998 | 15.1  | 50.3  | 6.59  | 9.89  | 76.08 |
| deltamethrin       | $Y = 0.0001X + 6.25e-007X^2$    | 0.998 | 7.5   | 25    | 5.05  | 7.21  | 82.60 |
| azoxystrobin       | $Y = 0.084 + 0.0017X$           | 0.996 | 2.73  | 9.09  | 5.24  | 10.68 | 84.47 |
| dimethomorph       | $Y = 0.0006X - 4.97e-009X^2$    | 0.993 | 6.25  | 20.8  | 5.29  | 7.56  | 83.36 |
| spiroxamine        | $Y = 0.0007X + 3.04e-007X^2$    | 0.983 | 6.36  | 21.2  | 8.58  | 7.77  | 79.44 |

|            |                                            |       |     |    |    |    |    |
|------------|--------------------------------------------|-------|-----|----|----|----|----|
| metamitron | $Y = 0.0006 \cdot X + 5.45e-008 \cdot X^2$ | 0.995 | 7.5 | 25 | Nd | Nd | Nd |
|------------|--------------------------------------------|-------|-----|----|----|----|----|

Nd: not determined

**Table S2.** Partitioning coefficient log K<sub>ow</sub> of assessed pesticides.

| Pesticide            | Log KOW |
|----------------------|---------|
| Foramsulfuron        | -0.78   |
| Pymetrozine          | -0.19   |
| Carbendazim          | 1.48    |
| Dimethenamid-P       | 1.89    |
| Dimethachlore        | 2.17    |
| Ethofumesate         | 2.7     |
| Malathion            | 2.75    |
| Myclobutanil         | 2.89    |
| Spiroxamine          | 2.89    |
| Tebutam              | 3       |
| Alachlor             | 3.09    |
| Epoxiconazole        | 3.3     |
| Kresoxim-Methyl      | 3.4     |
| Lindane              | 3.5     |
| Dimoxystrobin        | 3.59    |
| Bupirimate           | 3.68    |
| Tebufenpyrad         | 3.7     |
| Chlorpropham         | 3.76    |
| Fenoxycarb           | 4.07    |
| Clofentezine         | 4.09    |
| Trifloxystrobin      | 4.5     |
| Buprofezin           | 4.93    |
| Lambda cyhalothrin   | 5.5     |
| Cypermethrine        | 5.55    |
| Bromoxynil octanoate | 6.2     |
| Fenpropidine         | 6.4     |
| Bifenthrin           | 6.6     |

## Section S2. Non-volatile pesticides classification

Insecticides: Bifenthrin, Buprofezin, Clofentezine, Cypermethrin, Fenoxycarb, Lambda cyhalothrin, Lindane, Malathion, Tebufenpyrad,

Fungicides: Bupirimate, Cyprodinil, Diphenylamine, Dimoxystrobin, Fenpropidin, Kresoxim-Methyl, Myclobutanil, Pyrimethanil, Spiroxamine, Tolyfluand, Trifloxystrobin

Herbicides: Acetochlor, Alachlor, Benoxacor, Bromoxynil octanoate, Chlorpropham, Dimethachlor, Dimethenamid-P, Ethofumesate, Flurochloridone, Metolachlor, Pendimethalin, Propyzamide, Tebutam
